# Supplementary material for: Distinct effects of epirubicin, cisplatin and cyclophosphamide on ovarian somatic cells of prepuberal ovaries
Source: PubMed Central journal article supplement (PMC6914390; doi:10.18632/aging.102476), 2019-11-11
Supplement: aging-11-102476-s001..pdf [file aging-11-102476-s001..pdf]

## SUPPLEMENTARY FIGURES

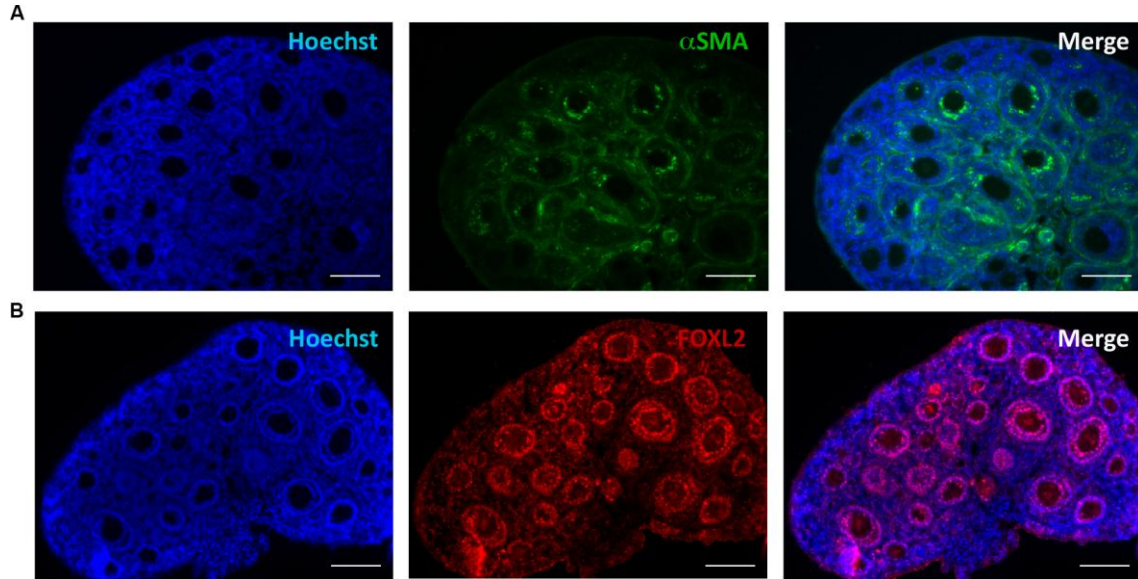

**Supplementary Figure 1. IF analysis of 8dpp ovaries.** Representative IF in histological sections of 8dpp ovaries showing (A)  $\alpha$ SMA (green) and (B) FOXL2 (red) positivity in cells at the periphery and in GC layers of growing follicles, respectively. Scale bar = 100 $\mu$ m.

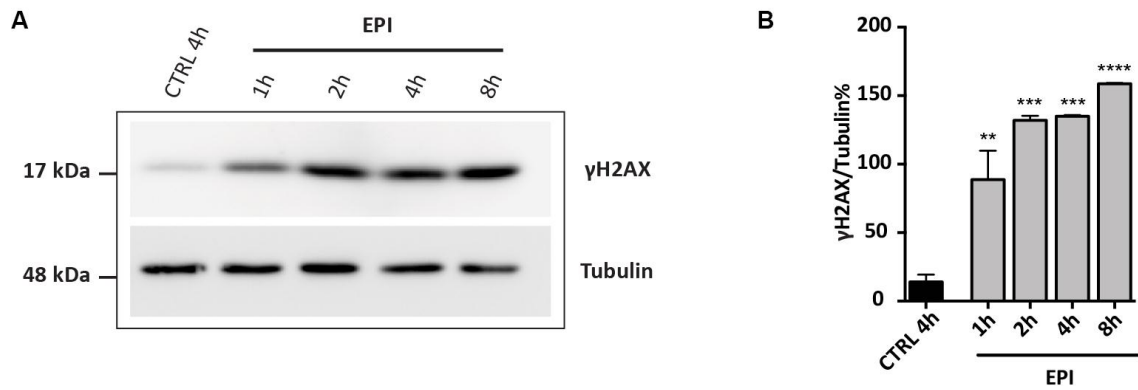

**Supplementary Figure 2. WB analysis of  $\gamma$ H2AX expression in ovarian somatic cells treated with EPI.** (A) Representative WB for  $\gamma$ H2AX in cultured ovarian somatic cells treated with 0.5 $\mu$ M EPI for the indicated times. (B) Densitometric quantification of the relative expression of  $\gamma$ H2AX normalized against tubulin. Data are expressed as mean  $\pm$  SEM of three analyses. Statistical differences vs control \*\* $p$ <0.01 \*\*\* $p$ <0.001 \*\*\*\* $p$ <0.0001.

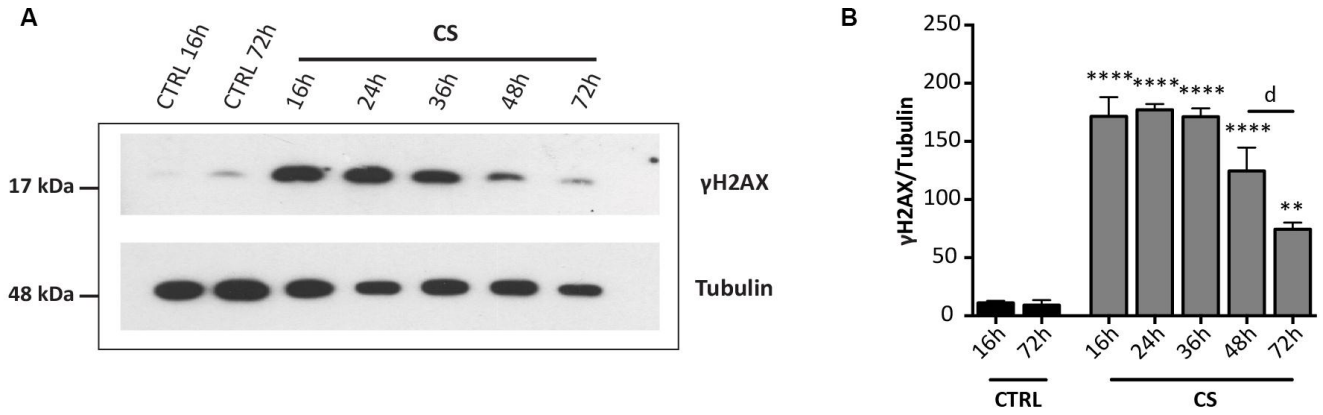

**Supplementary Figure 3. Analysis of CS-induced senescence in ovarian somatic cells.** (A) Representative WB of  $\gamma$ H2AX expression in ovarian somatic cells treated with CS. (B) Densitometric quantification of  $\gamma$ H2AX level normalized by tubulin. Data are expressed as mean  $\pm$  SEM of four analyses. Statistical differences vs control \*\* $p < 0.01$  \*\*\*\* $p < 0.0001$ ; CS 48 hrs vs CS 72 hrs  $d = p < 0.0001$ .

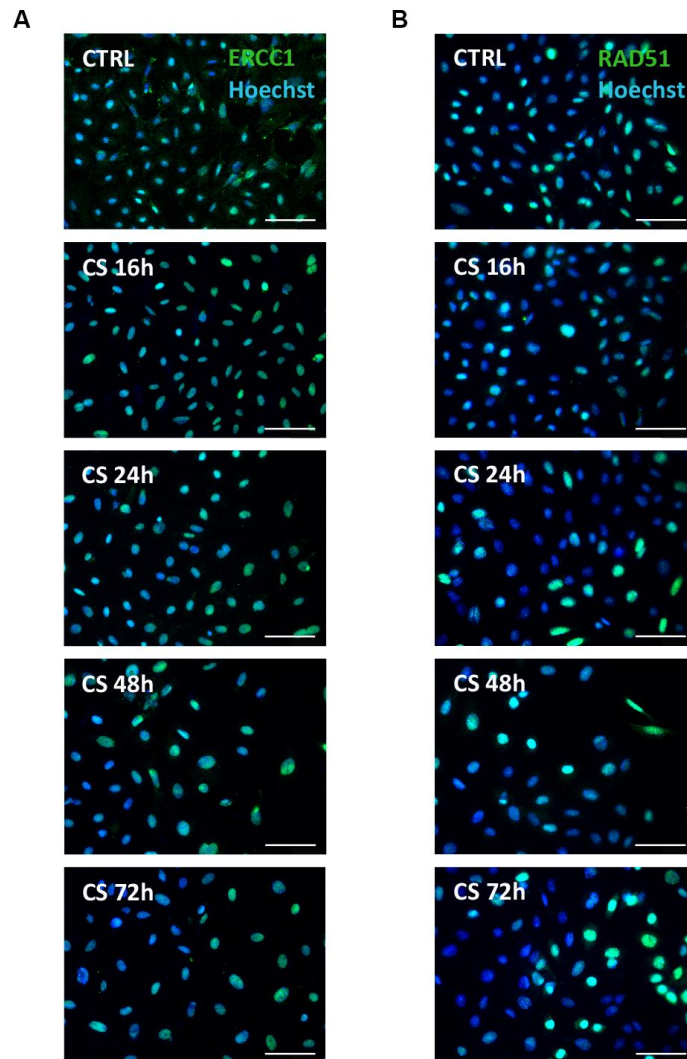

**Supplementary Figure 4. Analysis of ERCC1 and RAD51 expression after CS treatment.** (A, B) Representative IF of cells stained with ERCC1 (green, A) or RAD51 (green, B) after 16, 24, 48 and 72 hrs of treatment with 10  $\mu$ M CS. Scale bar = 100  $\mu$ m.

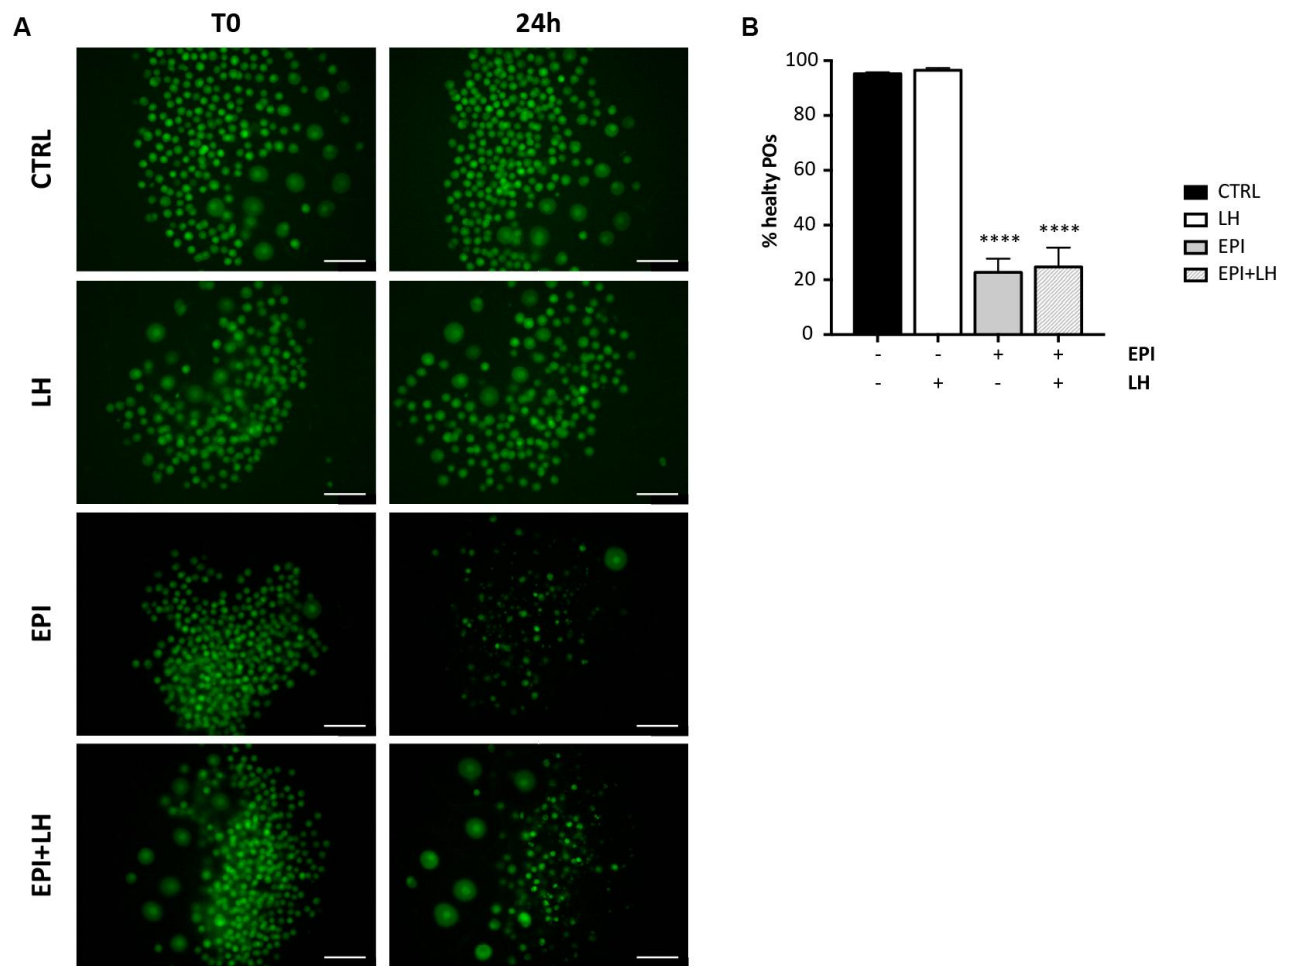

**Supplementary Figure 5. LH has no effect on EPI-induced apoptosis of POs.** (A) Ovarian fragments from P4 ovaries of p-18 c-Kit/GFP mice cultured for 4 days (T0) and incubated for 24 hrs in the presence 0.5 $\mu$ M EPI with/out 200mIU/mL LH, scale bar = 100 $\mu$ m. (B) Percentage of healthy GFP oocytes after 24 hrs of culture in the presence of the indicated compounds; only GFP-positive oocytes with a diameter < 20  $\mu$ m (within PMF) were considered for the score (Rossi et al., 2017). Data are represented as mean  $\pm$  SEM of three experiments. Statistical differences vs control \*\*\*\* $p$ <0.0001.

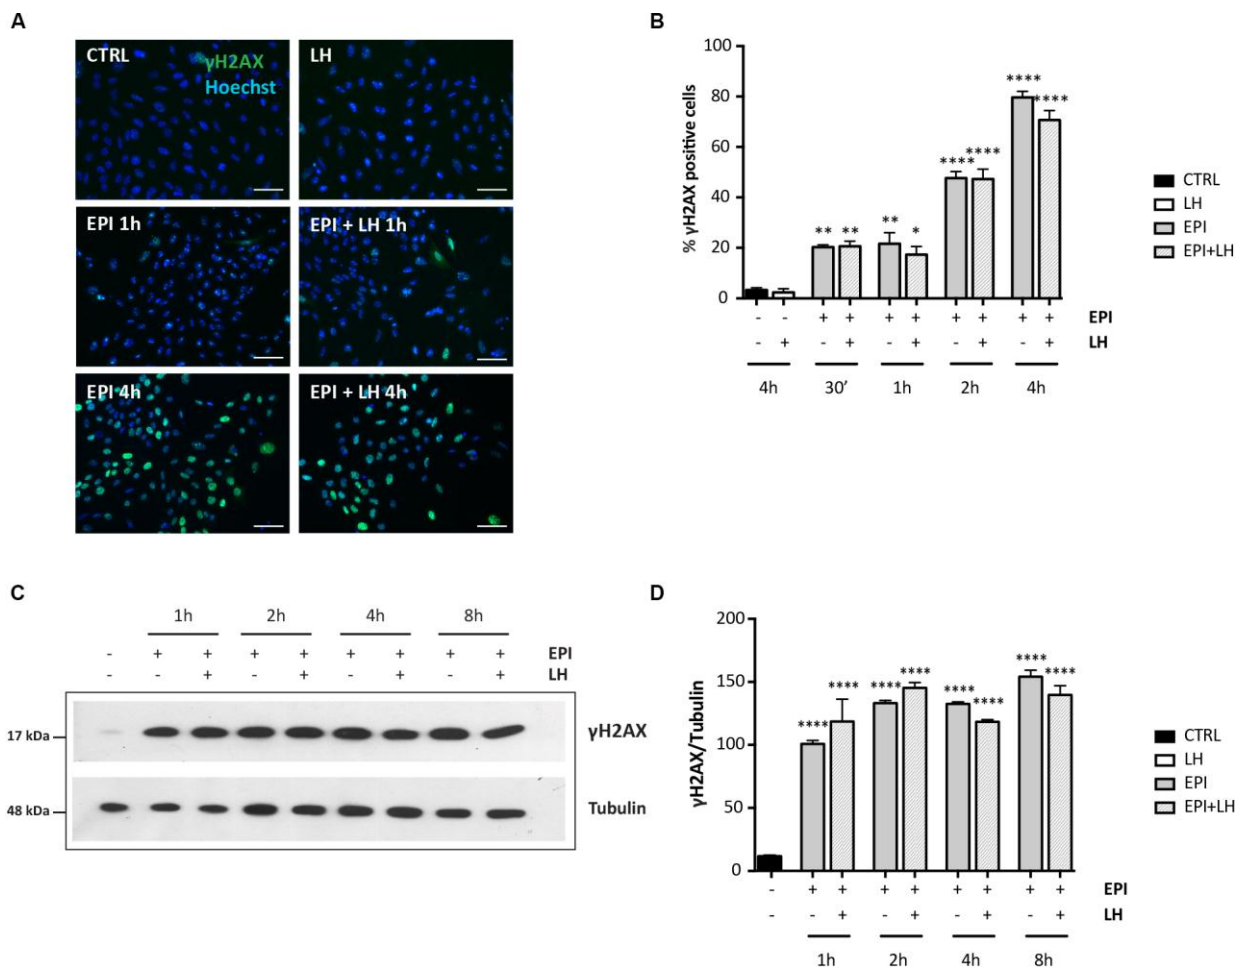

**Supplementary Figure 6. LH has no effect on DNA damages induced by EPI in ovarian somatic cells.** (A) Representative IF and quantification of ovarian somatic cells stained for  $\gamma$ H2AX (green) after 30', 1 hr and 4 hrs of treatment with 0.5  $\mu$ M EPI with/out 200 mIU/mL LH, scale bar = 100  $\mu$ m. (B) The graph reports the quantification of the percentage of cells positive for  $\gamma$ H2AX. Data are reported as mean  $\pm$  SEM of percent of  $\gamma$ H2AX positive cells scored in three experiments. Statistical differences vs control \* $p$ <0.05 \*\* $p$ <0.01 \*\*\*\* $p$ <0.0001. (C) Representative WB and (D) densitometric quantification of  $\gamma$ H2AX in the same groups up to 8 hrs. Data are shown as mean  $\pm$  SEM of three analyses. Statistical differences vs control \*\*\*\* $p$ <0.0001.

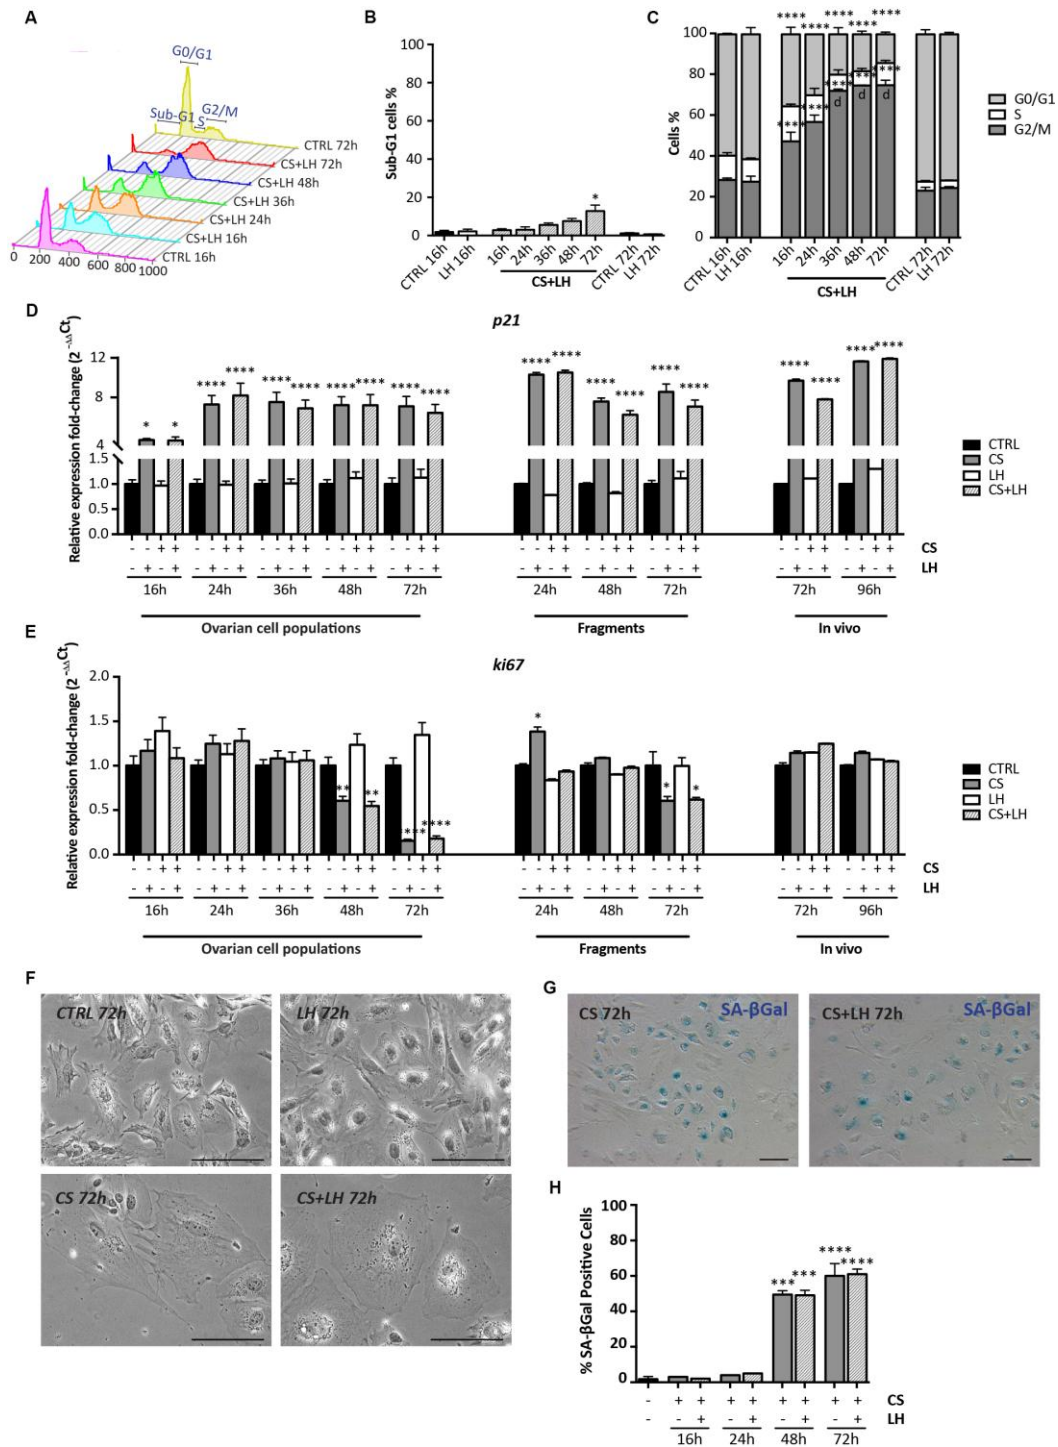

**Supplementary Figure 7. LH has no effect on SIPS induced by CS in the ovarian somatic cells.** (A–C) Representative flow cytometry of ovarian somatic cells treated with 10  $\mu$ M CS with/out 200mIU/mL LH. The graph reports result as mean  $\pm$  SEM of three experiments. Statistical differences vs control \* $p$ <0.05 \*\*\*\* $p$ <0.0001. Statistical differences vs 16hrs in the G2/M phase  $d = p$ <0.0001. (D, E) Comparison of qRT-PCR for (D) p21 and (E) ki67 between *in vitro* (ovarian somatic cells and ovarian fragments) and *in vivo* (ovaries from intraperitoneal injected mice) conditions. Data are shown as mean  $\pm$  SEM of three experiments. Statistical differences versus control group \* $p$ <0.05 \*\* $p$ <0.01 \*\*\*\* $p$ <0.0001. (F) Ovarian somatic cells acquiring large and flattened morphology typical of SIPS after 72 hrs of culture either in the presence either of CS and CS+LH, scale bar = 100 $\mu$ m. (G) Similar SA- $\beta$ gal activity in the same groups, scale bar =100 $\mu$ m. (H) The graph reports the percent of cells showing SA- $\beta$ gal activity at the indicated times. Data are expressed as mean  $\pm$  SEM of three experiments. Statistical differences vs control \*\*\* $p$ <0.001 \*\*\*\* $p$ <0.0001.

A

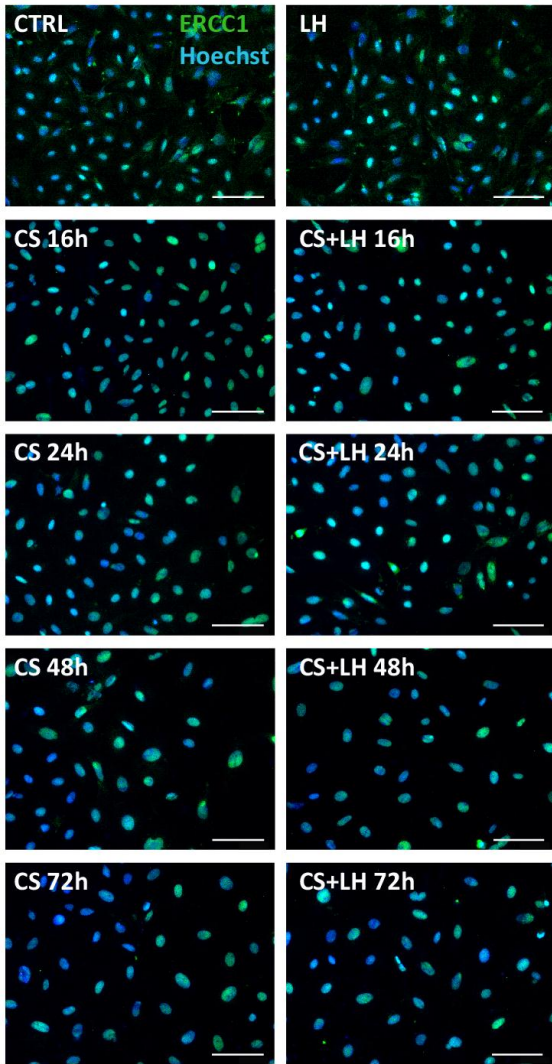

B

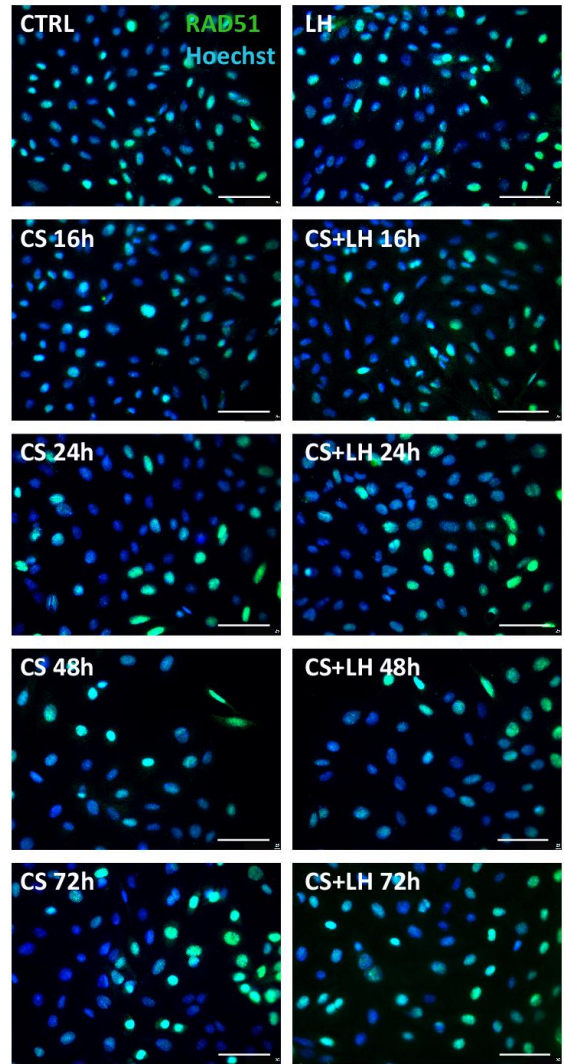

**Supplementary Figure 8. Analysis of ERCC1 and RAD51 expression after treatment with/out CS and LH.** (A, B) Representative IF of cells stained with ERCC1 (green, A) or RAD51 (green, B) after 16, 24, 48 and 72 hrs of treatment with 10  $\mu$ M CS and with/out 200 mIU/mL LH Scale bar = 100  $\mu$ m.
